# Supplementary material for: Effects of Carotid Artery Stiffness on Cerebral Small‐Vessel Disease and Cognition
Source: PubMed Central journal article supplement — J Am Heart Assoc. 2022 Dec 6;11(23):e027295. doi: 10.1161/JAHA.122.027295 (PMC9851463; doi:10.1161/jaha.122.027295), 2022-12-06
Supplement: JAH3-11-e027295-s001.pdf [file JAH3-11-e027295-s001.pdf]

# **SUPPLEMENTAL MATERIAL**

## Data S1.

### Supplemental Methods – Brain MRI protocol

Participants underwent a 1.5-hour multi-modal MRI scan. Brain MRI scans were acquired at the Clinical Imaging Research Centre, on 3-Tesla MRI scanners with a state-of-the-art 32-channel head coil. Structural images were obtained with the following protocol and sequences:

- **T1-weighted MRI:** High-resolution T1-weighted Magnetization Prepared Rapid Gradient Recalled Echo (MPRAGE) or similar versions were acquired for the whole brain or specific regions of interest.
- **T2-weighted MRI:** T2-weighted images were also acquired using a double spin echo.
- **Fluid Attenuated Inversion Recovery (FLAIR):** FLAIR data were acquired using FSE- IR sequence.
- **Susceptibility weighted imaging (SWI):** SWI data were acquired during GRE sequence.
- **Quality Assurance (QA):** Quality assurance scans were performed on the day when the patient scan is scheduled. The QA scan is acquired using a gradient echo pulse sequence. The QA images were analyzed in regards to signal to noise ratio (SNR), spatial resolution, slice thickness and location.

The standardized protocol for the scanner acquisition parameters is as follows (51);

3D T1-weighted imaging (1.0x1.0x1.0 mm<sup>3</sup> voxels, repetition time, TR=2300 ms, time to echo, TE=1.9 ms, inversion time (TI), 900 ms, flip angle 9°, matrix=256×256×180 mm<sup>3</sup>). 2D multislice T2-weighted (1.0x1.0x3.0 mm<sup>3</sup> voxels, TR=3000 ms, TE=10.1 ms, matrix=247x256). 2D multislice fluid-attenuated inversion recovery (FLAIR) images

(1.0x1.0x3.0 mm<sup>3</sup>; TR=9000 ms; TE=82 ms; TI 2500 ms, matrix=232 x 256). SWI (echo time = 20 ms; repetition time = 27 ms; flip angle = 15 degrees; field of view= 256 mm; field of view= 75%; image matrix = 192x256; slice thickness = 1.50 mm).

**Table S1. Characteristics of study population.**

|                                     | All<br>(N=272)    | NCI<br>(n=74)     | CIND<br>(n=99)    | AD<br>(n=78)      | VaD<br>(n=21)      |
|-------------------------------------|-------------------|-------------------|-------------------|-------------------|--------------------|
| <b>Vascular stiffness</b>           |                   |                   |                   |                   |                    |
| $\beta$ -index                      | 12.14<br>(5.91)   | 10.73<br>(4.42)   | 12.03<br>(5.90)   | 12.77<br>(6.11)   | 15.01<br>(8.43)    |
| Elastic modulus                     | 167.06<br>(90.55) | 144.18<br>(65.67) | 161.67<br>(86.17) | 180.13<br>(94.7)  | 221.44<br>(137.12) |
| Pulse wave velocity- $\beta$        | 7.39<br>(1.77)    | 6.91<br>(1.41)    | 7.30<br>(1.67)    | 7.64<br>(1.84)    | 8.50<br>(2.46)     |
| <b>CSVD markers</b>                 |                   |                   |                   |                   |                    |
| White matter hyperintensities (WMH) | 7.09<br>(3.77)    | 5.74<br>(3.68)    | 6.57<br>(3.41)    | 8.17<br>(3.66)    | 10.29<br>(3.49)    |
| Presence of lacunes, n (%)          | 69 (25.37)        | 9 (12.16)         | 24<br>(24.24)     | 19<br>(24.36)     | 17<br>(80.95)      |
| Presence of CMBs, n (%)             | 115<br>(42.28)    | 25<br>(33.78)     | 43<br>(43.43)     | 38<br>(48.72)     | 9<br>(42.86)       |
| <b>Cognition</b>                    |                   |                   |                   |                   |                    |
| Global z-scores                     | -2.49<br>(2.55)   | -0.11<br>(1.02)   | -1.92<br>(1.47)   | -4.79<br>(2.24)   | -4.98<br>(2.09)    |
| Attention                           | 7.11<br>(2.39)    | 8.47<br>(2.07)    | 7.42<br>(2.21)    | 5.98<br>(2.08)    | 5.36<br>(1.84)     |
| Executive function                  | 100.39<br>(42.47) | 61.22<br>(16.77)  | 95.37<br>(35.65)  | 134.29<br>(32.49) | 140.75<br>(26.18)  |
| Language                            | 13.44<br>(2.37)   | 14.74<br>(0.60)   | 14.12<br>(1.03)   | 11.70<br>(3.15)   | 12.05<br>(2.97)    |
| Visuomotor speed                    | 20.61<br>(14.54)  | 35.42<br>(10.58)  | 21.72<br>(10.51)  | 8.55<br>(8.38)    | 7.57<br>(9.37)     |
| Visuospatial function               | 20.33<br>(10.74)  | 29.01<br>(5.12)   | 22.64<br>(7.99)   | 12.01<br>(10.02)  | 9.55<br>(8.31)     |
| Memory                              | 7.54<br>(5.44)    | 13.60<br>(4.010)  | 7.69<br>(4.19)    | 2.98<br>(1.75)    | 2.83<br>(1.63)     |

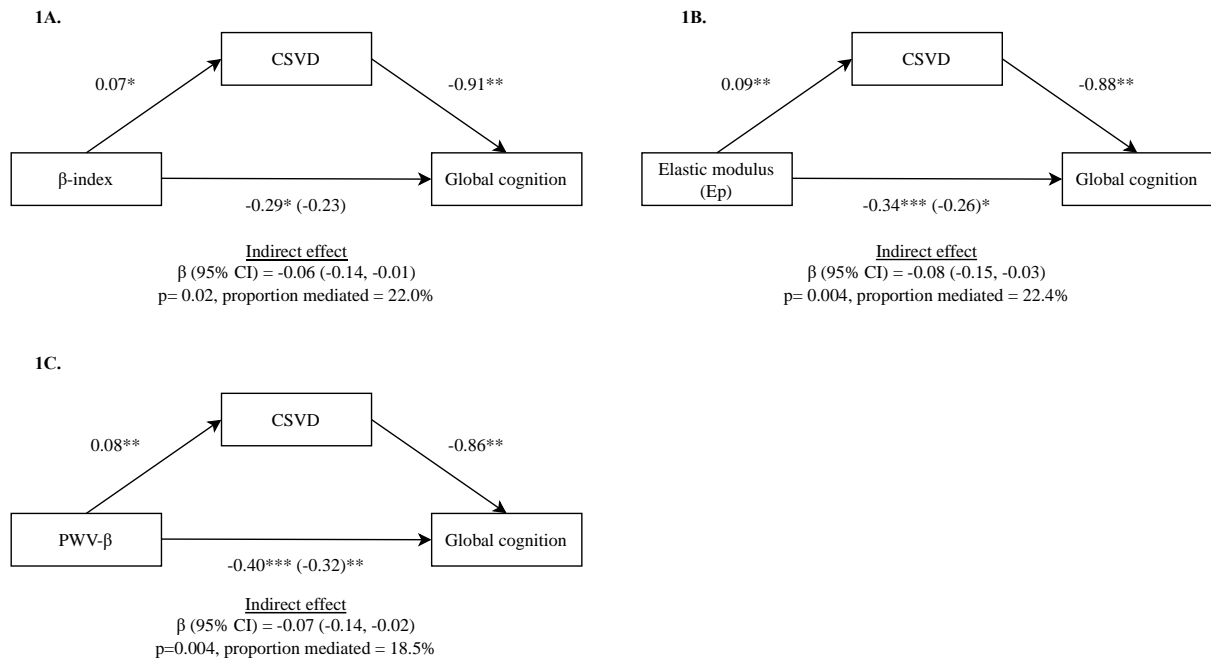

**Figure S1. Mediation effect of CSVD on the association between carotid artery stiffness and global cognition.** N=272; all models were adjusted for age, sex, education, hypertension, diabetes, hyperlipidaemia, CVD, smoking; \* $p < 0.05$ , \*\* $p < 0.01$ , \*\*\* $p < 0.001$ .

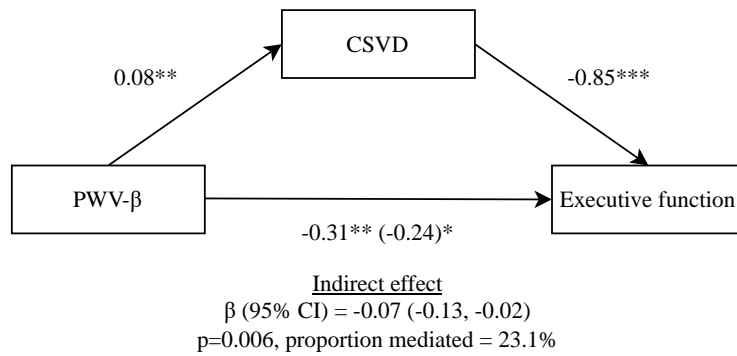

**Figure S2. Mediation effect of CSVD on the association between PWV- $\beta$  and executive function.** N=272; all models were adjusted for age, sex, education, hypertension, diabetes, hyperlipidaemia, CVD, smoking; \* $p < 0.05$ , \*\* $p < 0.01$ , \*\*\* $p < 0.001$ .

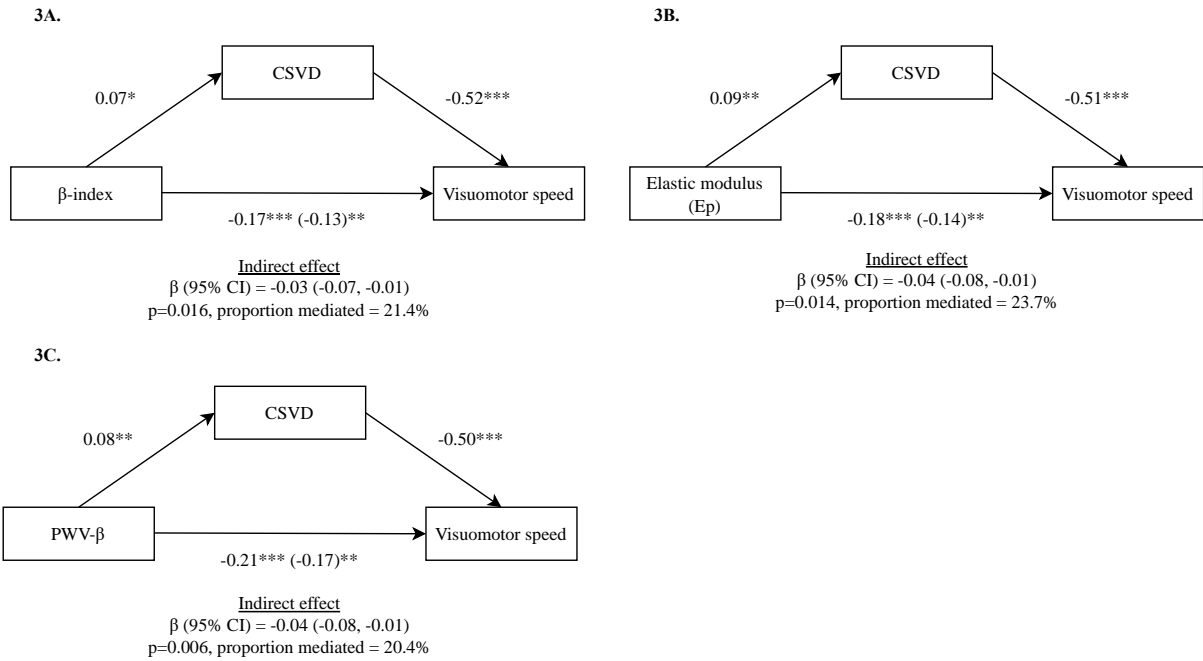

**Figure S3. Mediation effect of CSVD on the association between carotid artery stiffness and visuomotor speed.** N=272; all models were adjusted for age, sex, education, hypertension, diabetes, hyperlipidaemia, CVD, smoking; \* $p < 0.05$ , \*\* $p < 0.01$ , \*\*\* $p < 0.001$ .

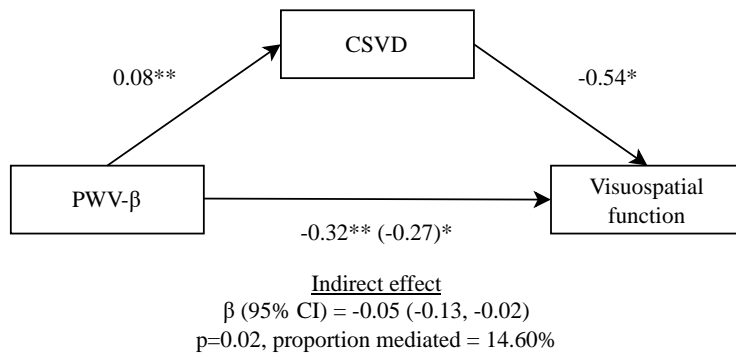

**Figure S4. Mediation effect of CSVD on the association between carotid artery stiffness and visuospatial function.** N=272; all models were adjusted for age, sex, education, hypertension, diabetes, hyperlipidaemia, CVD, smoking; \* $p < 0.05$ , \*\* $p < 0.01$ , \*\*\* $p < 0.001$ .

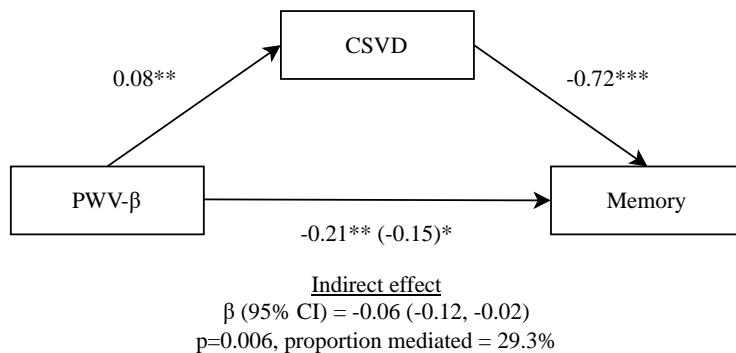

**Figure S5. Mediation effect of CSVD on the association between carotid artery stiffness and memory.** N=272; all models were adjusted for age, sex, education, hypertension, diabetes, hyperlipidaemia, CVD, smoking; \* $p < 0.05$ , \*\* $p < 0.01$ , \*\*\* $p < 0.001$ .
